# Supplementary material
Source: PubMed Central journal article supplement (PMC4128903)
Supplement: NIHMS617786-supplement-01.pdf [file NIHMS617786-supplement-01.pdf]

| Supplemental Table: Type of PTM in LTx Patients Stratified by LAS                        |                 |                 |                 |
|------------------------------------------------------------------------------------------|-----------------|-----------------|-----------------|
| Malignancy                                                                               | LAS             |                 | <i>p</i> -value |
|                                                                                          | Pre-LAS         | Post-LAS        |                 |
| Melanoma                                                                                 | 5/170 (2.9%)    | 45/568 (7.9%)   | 0.02            |
| Non-melanoma skin cancer                                                                 | 5/170 (2.9%)    | 148/568 (26.1%) | <0.01           |
| Solid organ tumor                                                                        | 16/170 (9.4%)   | 281/568 (49.5%) | <0.01           |
| Hematologic tumor                                                                        | 3/170 (1.8%)    | 58/568 (10.2%)  | <0.01           |
| Multiple tumors                                                                          | 0/170 (0%)      | 22/568 (3.9%)   | <0.01           |
| Other                                                                                    | 141/170 (82.9%) | 14/568 (2.5%)   | <0.01           |
| PTM = pre-transplant malignancy, LTx = lung transplantation, LAS = lung allocation score |                 |                 |                 |
